# Supplementary material for: Drosophila Insulin receptor regulates the persistence of injury-induced nociceptive sensitization
Source: Oxford University Press journal article supplement (doi:10.1242/dmm.034231), 2018-05-01
Supplement: dmm034231supp.pdf [file dmm034231supp.pdf]

**Supplementary Table 1: Gal4 Driver lines used.**

| Gal4                                     | Tissues                                 | References                        |
|------------------------------------------|-----------------------------------------|-----------------------------------|
| <i>Gal4<sup>109(2)80</sup> (md-Gal4)</i> | multi-dendritic sensory neurons         | (Gao et al., 1999)                |
| <i>21-7-Gal4</i>                         | multi-dendritic sensory neurons         | (Song et al., 2007)               |
| <i>ppk1.9-Gal4</i>                       | class IV nociceptive md sensory neurons | (Ainsley et al., 2003)            |
| <i>dilp2-Gal4</i>                        | Insulin Producing Cells                 | (Rulifson et al., 2002)           |
| <i>hmlΔ-Gal4</i>                         | hemocytes                               | (Sinenko and Mathey-Prevot, 2004) |
| <i>Dmef2-Gal4</i>                        | larval muscles                          | (Zars et al., 2000)               |
| <i>Gal4<sup>OK376</sup> (FB-Gal4)</i>    | larval fat body                         | (Wu et al., 2009)                 |

**Supplementary Table 2: Genotypes of larvae used in this study**

|              |                                                                                                                                                                                                                                                                                                                                                                      |
|--------------|----------------------------------------------------------------------------------------------------------------------------------------------------------------------------------------------------------------------------------------------------------------------------------------------------------------------------------------------------------------------|
| Figure 1     | <i>w<sup>1118</sup></i><br><i>w<sup>1118</sup>; ; InR<sup>e19</sup>/+</i><br><i>w<sup>1118</sup>; ; InR<sup>93Dj4</sup>/+</i><br><i>w<sup>1118</sup>; ; InR<sup>e19/93Dj4</sup></i>                                                                                                                                                                                  |
| Figure 2B-2D | <i>w<sup>1118</sup>; dilp2-Gal4/ ppkCD4tdTOM</i><br><i>w<sup>1118</sup>; ppkCD4tdTOM/+; UAS-Kir2.1/+</i><br><i>w<sup>1118</sup>; dilp2-Gal4/ppkCD4tdTOM; UAS-Kir2.1/+</i>                                                                                                                                                                                            |
| Figure 2E-2F | <i>w<sup>1118</sup>; dilp2-Gal4/+</i><br><i>w<sup>1118</sup>; ; UAS-Kir2.1/+</i><br><i>w<sup>1118</sup>; dilp2-Gal4/+; UAS-Kir2.1/+</i>                                                                                                                                                                                                                              |
| Figure 3B-3D | <i>w<sup>1118</sup>; ppkCD4tdTOM</i>                                                                                                                                                                                                                                                                                                                                 |
| Figure 3E-3H | <i>w<sup>1118</sup></i>                                                                                                                                                                                                                                                                                                                                              |
| Figure 4A-4D | <i>w<sup>1118</sup>; Gal4<sup>109(2)80</sup>/+</i><br><i>w<sup>1118</sup>; ; UAS-InR<sup>RNAi(JF01482)</sup>/+</i><br><i>w<sup>1118</sup>; ; UAS-InR<sup>RNAi(JF01183)</sup>/+</i><br><i>w<sup>1118</sup>; Gal4<sup>109(2)80</sup>/+; UAS-InR<sup>RNAi(JF01482)</sup>/+</i><br><i>w<sup>1118</sup>; Gal4<sup>109(2)80</sup>/+; UAS-InR<sup>RNAi(JF01183)</sup>/+</i> |
| Figure 4E-4G | <i>w<sup>1118</sup>; ; UAS-InR<sup>RNAi(JF01482)</sup>/ppk1.9-Gal4,UAS-mCD8::GFP</i><br><i>w<sup>1118</sup>; ; UAS-Luc<sup>RNAi</sup>/ppk1.9-Gal4,UAS-mCD8::GFP</i>                                                                                                                                                                                                  |
| Figure 5     | <i>w<sup>1118</sup>; Gal4<sup>109(2)80</sup>/UAS-CaMPARI; UAS-InR<sup>RNAi(JF01482)</sup>/+</i>                                                                                                                                                                                                                                                                      |

$w^{1118}; Gal4^{109(2)80}/UAS-CaMPARI$

Figure 6

$w^{1118}; Gal4^{109(2)80}/+$   
 $w^{1118}; UAS-InR^{CA(A1325D)}/+$   
 $w^{1118}; Gal4^{109(2)80}/+; UAS-InR^{CA(A1325D)}/+$

Figure 7A-7C

$w^{1118}; Gal4^{109(2)80}/+; InR^{e19}/+$   
 $w^{1118}; UAS-InR/+; InrR^{e19}/+$   
 $w^{1118}; Gal4^{109(2)80}/UAS-InR; InR^{e19}/+$

Figure 7D-7F

$w^{1118}; Gal4^{109(2)80}/+;$   
 $w^{1118}; UAS-InR^{CA(A1325D)}/+$   
 $w^{1118}; Gal4^{109(2)80}/+; UAS-InR^{CA(A1325D)}/+$

Figure S1

$w^{1118}$   
 $w^{1118}; InR^{e19}/+$   
 $w^{1118}; InR^{93Dj4}/+$   
 $w^{1118}; InR^{e19/93Dj4}$

Figure S2

$w^{1118}; Gal4^{OK376}/+$   
 $w^{1118}; Gal4^{OK376}/+; UAS-InR^{RNAi(JF01482)}/+$   
 $w^{1118}; Dmef2-Gal4/+$   
 $w^{1118}; Dmef2-Gal4/UAS-InR^{RNAi(JF01482)}$   
 $w^{1118}; hml\Delta-Gal4, UAS-GFP/+$   
 $w^{1118}; hml\Delta-Gal4, UAS-GFP/+; UAS-InR^{RNAi(JF01482)}/+$

Figure S3

$w^{1118}; 21-7-Gal4/+$   
 $w^{1118}; 21-7-Gal4/+; UAS-InR^{RNAi(JF01482)}/+$

Figure S4

$w^{1118}; ppk1.9-Gal4/+$   
 $w^{1118}; ppk1.9-Gal4/UAS-InR^{RNAi(JF01482)}$

Figure S6

$w^{1118}; Gal4^{109(2)80}/+$   
 $w^{1118}; UAS-InR^{DN(1)}/+$   
 $w^{1118}; UAS-InR^{DN(2)}/+$   
 $w^{1118}; Gal4^{109(2)80}/UAS-InR^{DN(1)}/+$   
 $w^{1118}; Gal4^{109(2)80}/+; UAS-InR^{DN(2)}/+$

Figure S7

$w^{1118}; Gal4^{109(2)80}/+$   
 $w^{1118}; Gal4^{109(2)80}/+; UAS-chico^{RNAi(JF02964)}/+$   
 $w^{1118}; Gal4^{109(2)80}/+; UAS-Pi3K68D^{RNAi(GD7348)}/+$   
 $w^{1118}; Gal4^{109(2)80}/+; UAS-Pi3K92E^{RNAi(GD11228)}/+$

## References

- AINSLEY, J. A., PETTUS, J. M., BOSENKO, D., GERSTEIN, C. E., ZINKEVICH, N., ANDERSON, M. G., ADAMS, C. M., WELSH, M. J. & JOHNSON, W. A. 2003. Enhanced locomotion caused by loss of the Drosophila DEG/ENaC protein Pickpocket1. *Curr Biol*, 13, 1557-63.
- GAO, F. B., BRENMAN, J. E., JAN, L. Y. & JAN, Y. N. 1999. Genes regulating dendritic outgrowth, branching, and routing in Drosophila. *Genes Dev*, 13, 2549-61.
- RULIFSON, E. J., KIM, S. K. & NUSSE, R. 2002. Ablation of insulin-producing neurons in flies: growth and diabetic phenotypes. *Science*, 296, 1118-20.
- SINENKO, S. A. & MATHEY-PREVOT, B. 2004. Increased expression of Drosophila tetraspanin, Tsp68C, suppresses the abnormal proliferation of ytr-deficient and Ras/Raf-activated hemocytes. *Oncogene*, 23, 9120-8.
- SONG, W., ONISHI, M., JAN, L. Y. & JAN, Y. N. 2007. Peripheral multidendritic sensory neurons are necessary for rhythmic locomotion behavior in Drosophila larvae. *Proc Natl Acad Sci U S A*, 104, 5199-204.
- WU, Y., BROCK, A. R., WANG, Y., FUJITANI, K., UEDA, R. & GALKO, M. J. 2009. A blood-borne PDGF/VEGF-like ligand initiates wound-induced epidermal cell migration in Drosophila larvae. *Curr Biol*, 19, 1473-7.
- ZARS, T., FISCHER, M., SCHULZ, R. & HEISENBERG, M. 2000. Localization of a short-term memory in Drosophila. *Science*, 288, 672-5.

## Supplementary Figures

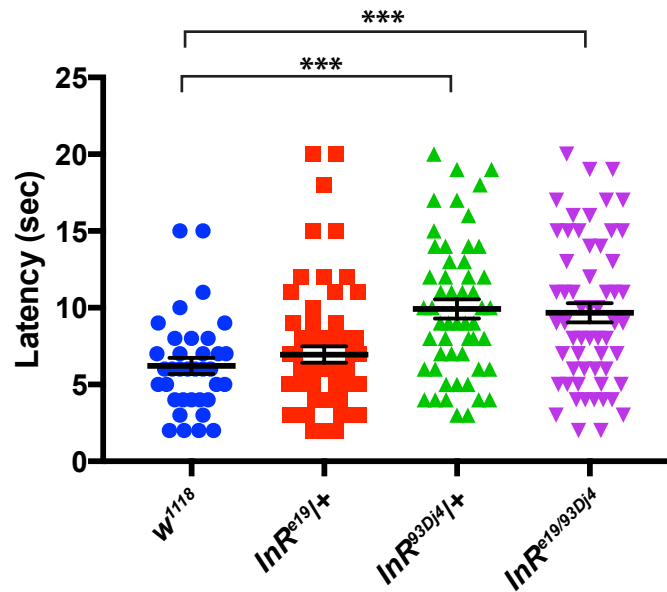

**Supplementary Figure 1. InR mutant larvae show a mild increase in latency of thermal nociceptive behavior in the absence of UV injury.** The data from Figure 1C (baseline, 43 °C thermal stimuli) are plotted to compare the average latency of each group. Each data point = an observed latency; middle bar = mean; error bar = standard deviation. Statistics: one-way ANOVA with Dunnett's multiple comparison post-hoc test.

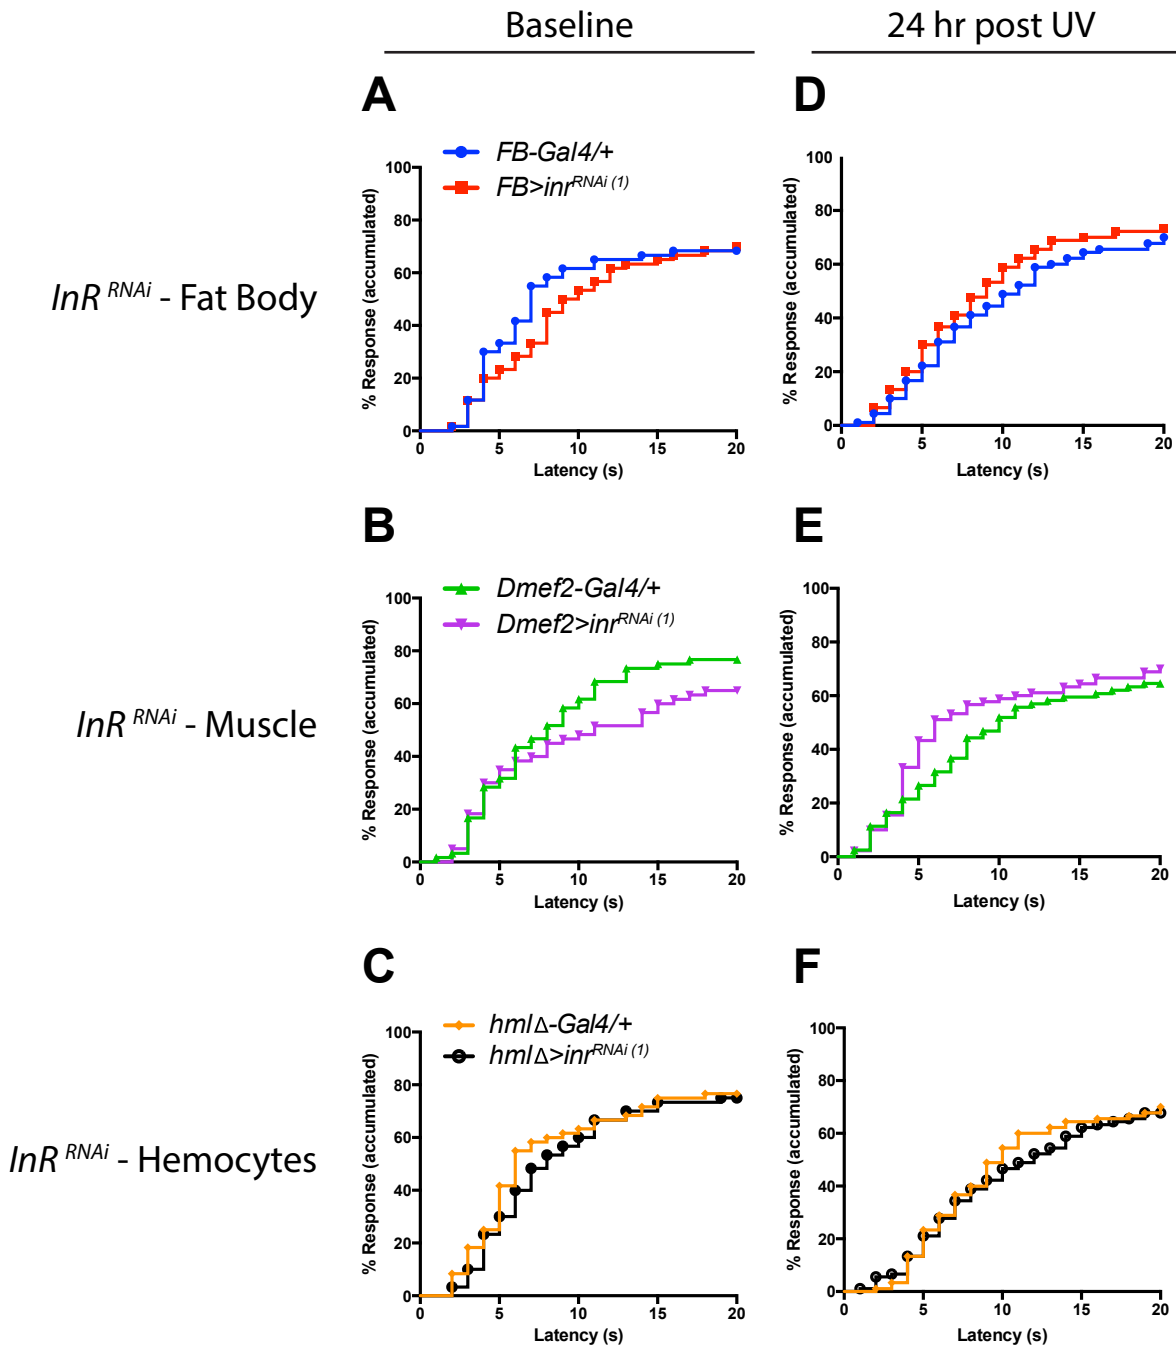

**Supplementary Figure 2. Knock down of Insulin Receptor in other tissues does not cause persistent thermal hyperalgesia.** Quantitation of nociceptive behavioral responses to thermal stimulation at 43 °C when *UAS-InR<sup>RNAi</sup>* is expressed in the indicated tissues. (A-C) Baseline responses without UV-induced tissue damage (n = 90). (A) Fat body, (B) Muscle, (C) Hemocytes. (D-F) Thermal sensitivity at 24 hours post UV. (D) Fat body (n = 90), (E) Muscle (n = 79 for *Dmef2-Gal4* alone control, 90 for RNAi), (F) Hemocytes (n = 90). See Table S1 for Gal4 Driver specifics.

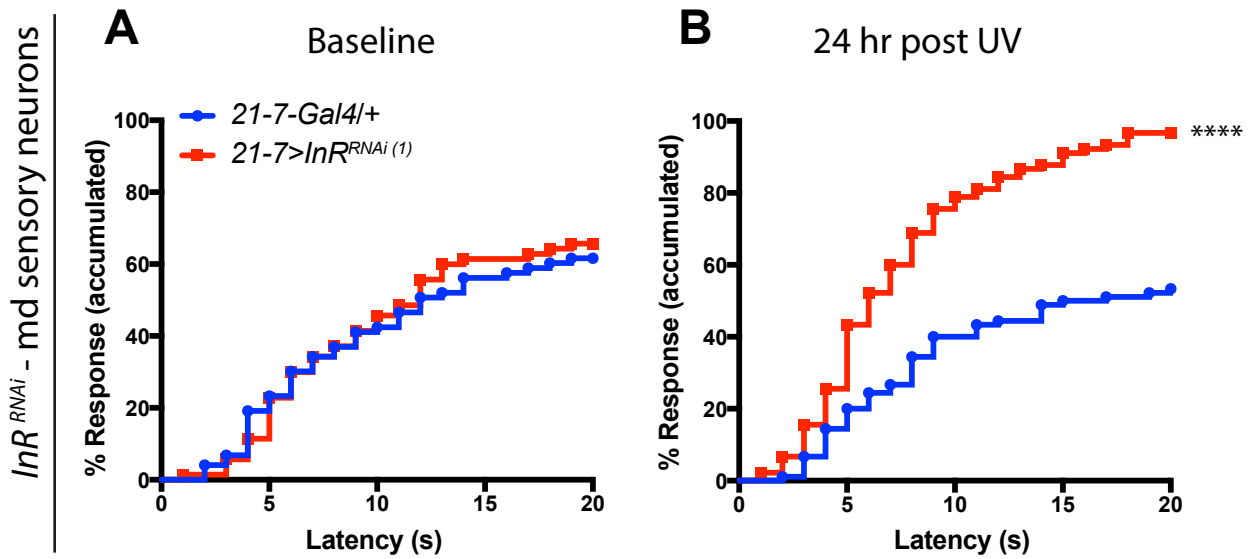

**Supplementary Figure 3. Expression of  $UAS-InR^{RNAi}$  via an alternative md neuron-specific Gal4 driver also causes persistent thermal hyperalgesia.** Quantitation of nociceptive behavioral responses to thermal stimulation at 43 °C when  $UAS-InR^{RNAi}$  is expressed via the md sensory neuron-specific driver *21-7-Gal4*. (A) Baseline responses without UV-induced tissue damage (n = 73 for *21-7-Gal4* alone control, 70 for RNAi). (B) Thermal sensitivity at 24 hours post UV. (n = 90).

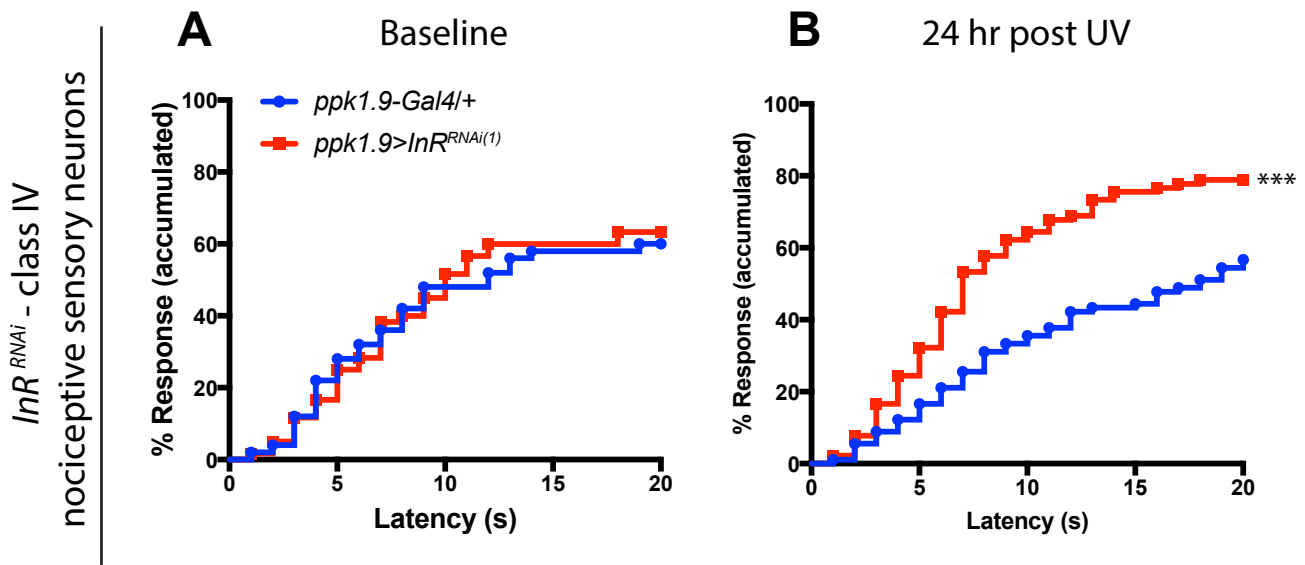

**Supplementary Figure 4. Expression of *UAS-InR<sup>RNAi</sup>* via a class IV md neuron-specific Gal4 driver also causes persistent thermal hyperalgesia.** Quantitation of nociceptive behavioral responses to thermal stimulation at 43 °C when *UAS-InR<sup>RNAi</sup>* is expressed via class IV nociceptive neuron-specific driver (*ppk1.9-Gal4*). (A) Baseline responses without UV-induced tissue damage (n = 50 for *ppk1.9-Gal4* alone control, 60 for RNAi). (B) Thermal sensitivity at 24 hours post UV. (n = 90).



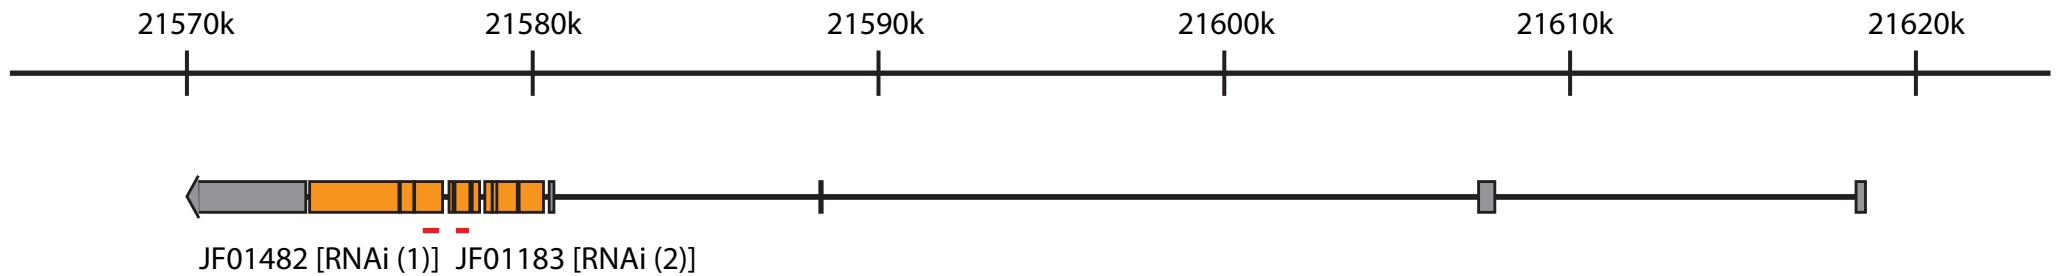

**Supplementary Figure 5. Schematic of the *InR* locus and position of *UAS-RNAi* transgenes targeting *InR*.** Two of non-overlapping RNAi lines targeting *InR* were used. JF01482 = *UAS-InR<sup>RNAi (1)</sup>*; JF01183 = *UAS-InR<sup>RNAi (2)</sup>*.

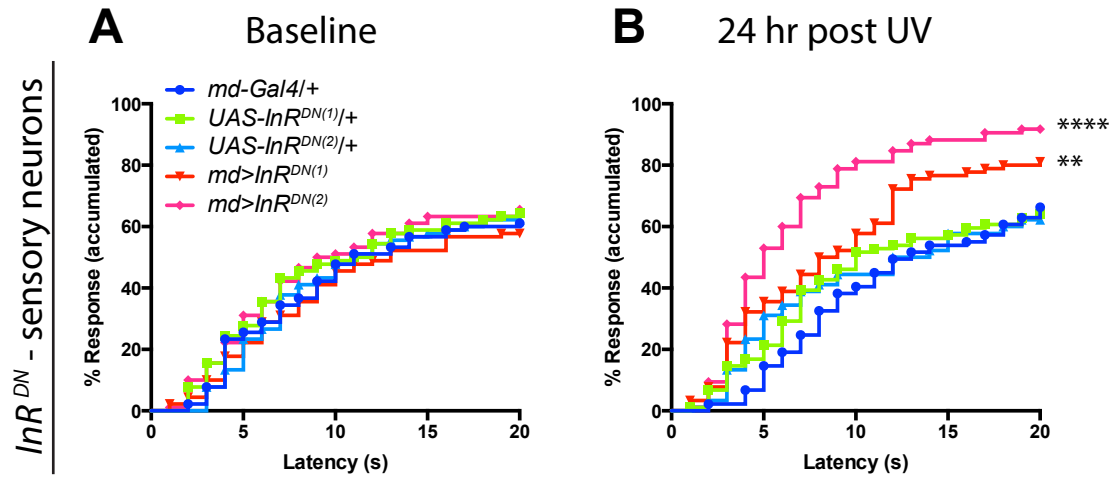

**Supplementary Figure 6. Sensory neuron-specific expression of a dominant negative form**

**of the Insulin Receptor causes persistent thermal hyperalgesia.** Quantitation of nociceptive

behavioral responses to thermal stimulation at 43 °C when *UAS-InR<sup>DN</sup>* is expressed in *md*

sensory neurons. (A) Baseline responses without UV-induced tissue damage (n = 90). (B)

Thermal sensitivity at 24 hours post UV (n = 89 for *md-Gal4*, *UAS-InR<sup>DN(1)</sup>*, 85 for *md> InR<sup>DN(2)</sup>*,

90 for the rest).

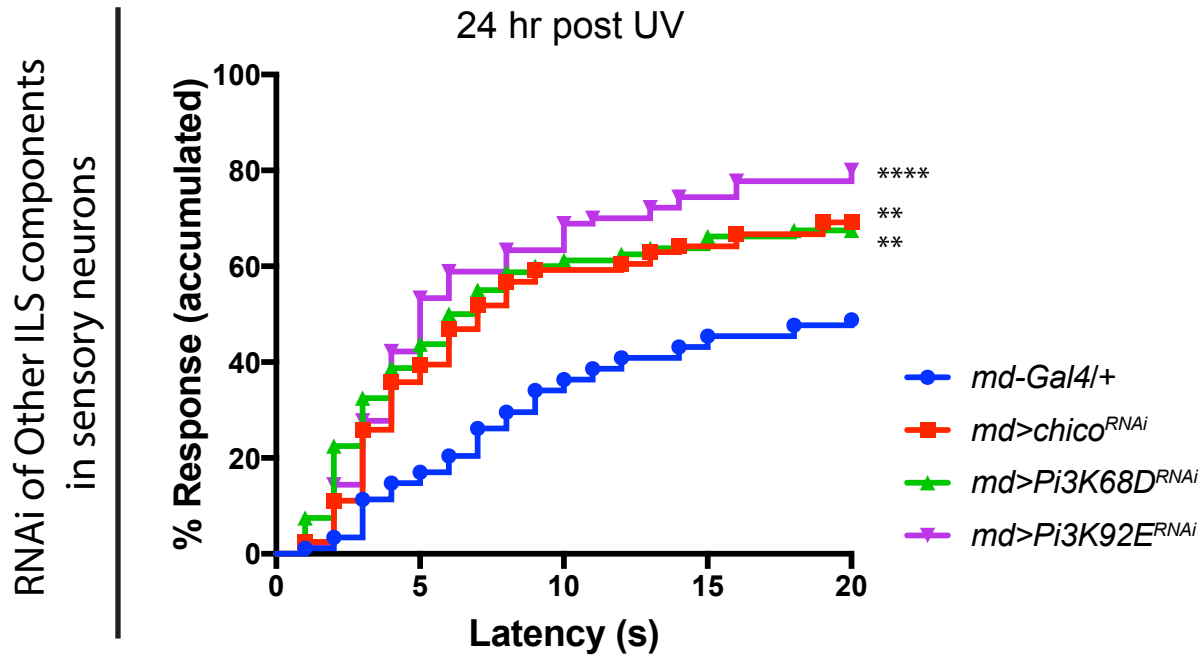

**Supplementary Figure 7. *md* neuron-specific expression of RNAi transgenes targeting other components of ILS also causes persistent thermal hyperalgesia.** Quantitation of nociceptive behavioral responses to thermal stimulation at 43 °C when *UAS-RNAi* transgenes targeting signaling components of the ILS pathway are expressed in *md* sensory neurons. Thermal sensitivity at 24 hours post UV (n = 88 for *md-Gal4* alone control, 81 for *chico<sup>RNAi</sup>*, 80 for *Pi3K68D<sup>RNAi</sup>*, 90 for *Pi3K92E<sup>RNAi</sup>*).
